# Supplementary material for: Effects of selective and combined activation of estrogen receptor α and β on reproductive organ development and sexual behaviour in Japanese quail (Coturnix japonica)
Source: PLoS One. 2017 Jul 3;12(7):e0180548. doi: 10.1371/journal.pone.0180548 (PMC5495399; doi:10.1371/journal.pone.0180548)

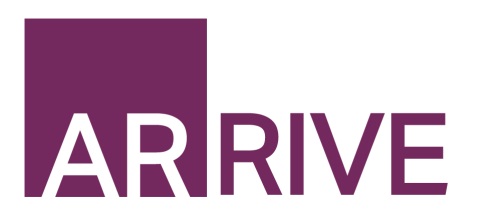


The ARRIVE Guidelines Checklist

Animal Research: Reporting In Vivo Experiments

Carol Kilkenny1, William J Browne2, Innes C Cuthill3, Michael Emerson4 and Douglas G Altman5

*1The National Centre for the Replacement, Refinement and Reduction of Animals in Research, London, UK, 2School of Veterinary Science, University of Bristol, Bristol, UK, 3School of Biological Sciences, University of Bristol, Bristol, UK, 4National Heart and Lung Institute, Imperial College London, UK, 5Centre for Statistics in Medicine, University of Oxford, Oxford, UK.*

|  | | ITEM | RECOMMENDATION | Section/ Paragraph |
| --- | --- | --- | --- | --- |
| 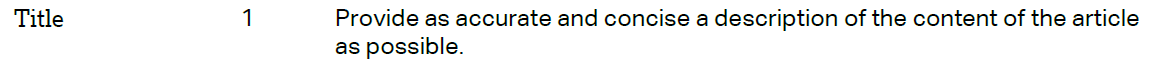 | | | x |
| 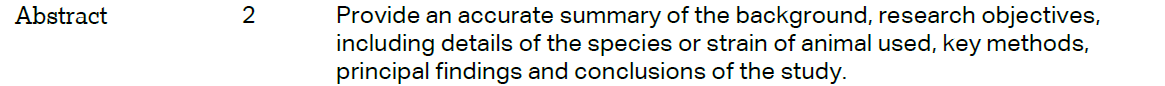 | | | x |
| INTRODUCTION | | |  |
| 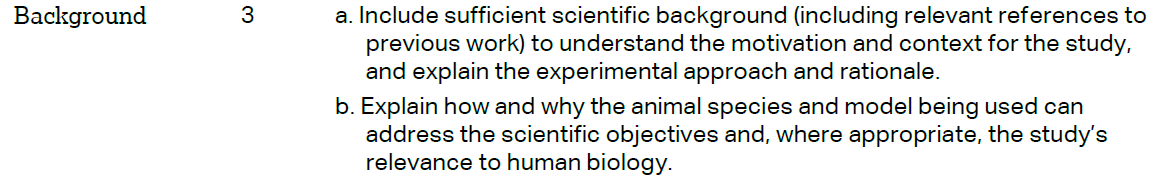 | | | x |
| 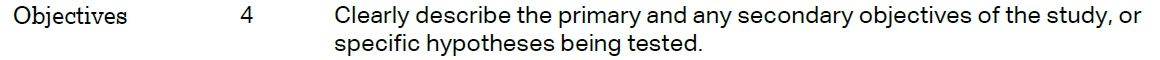 | | | x |
| METHODS | | |  |
| 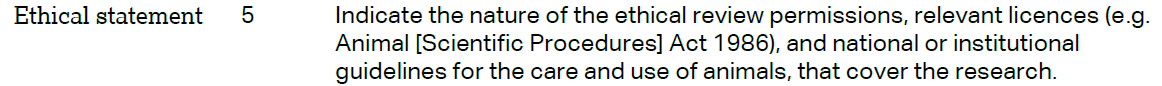 | | | x |
| 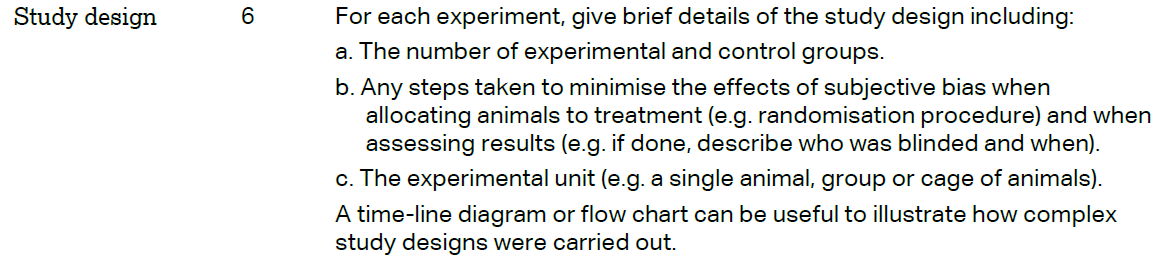 | | | x |
| 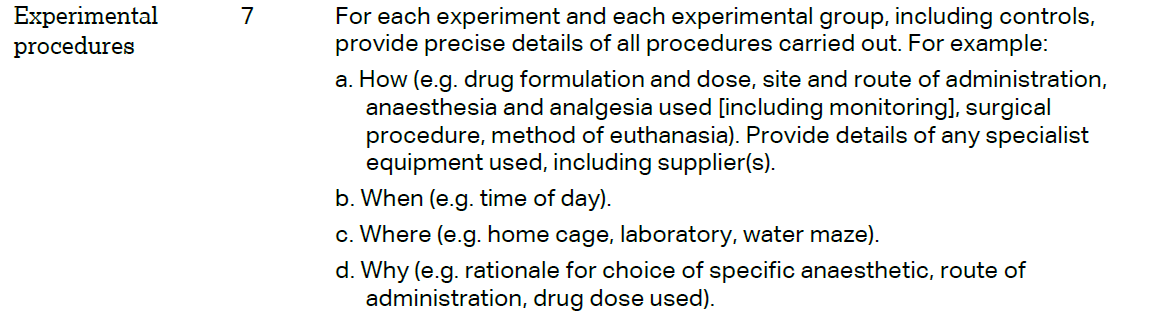 | | | x |
| 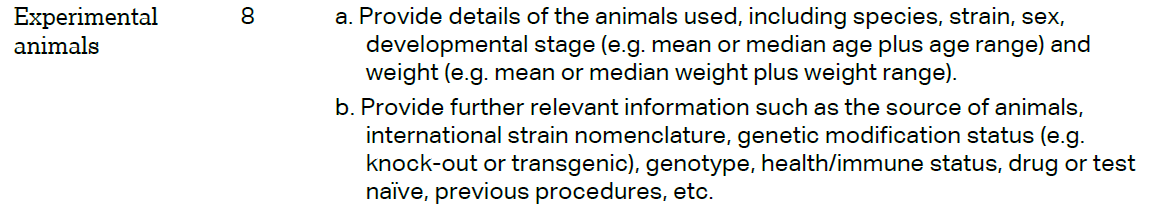 | | | x |

The ARRIVE guidelines. Originally published in *PLoS Biology*, June 20101

| 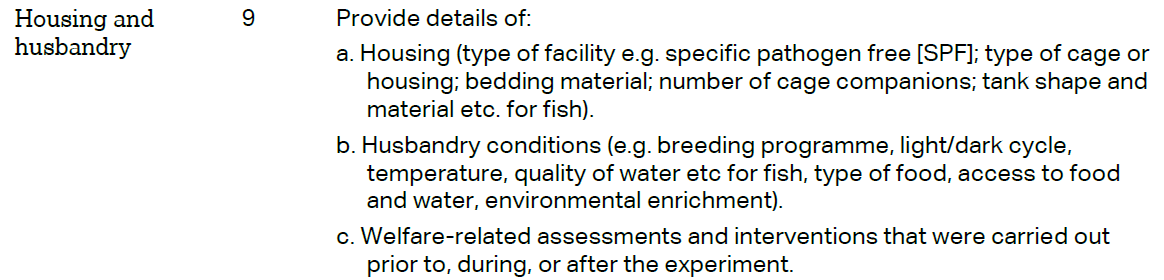 | x | |
| --- | --- | --- |
| 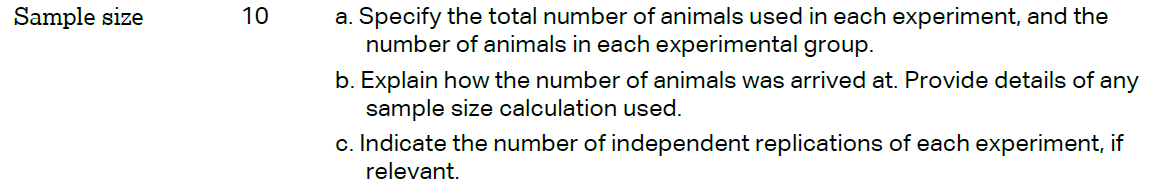 | x | |
| 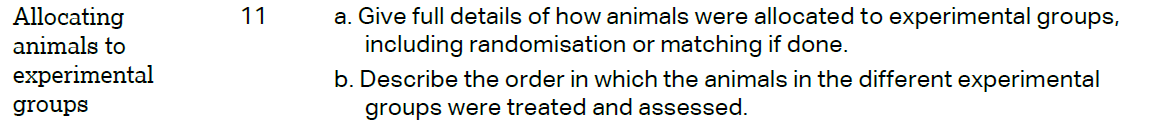 | x | |
| 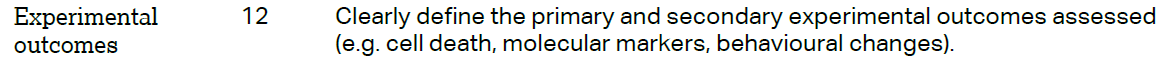 | x | |
| 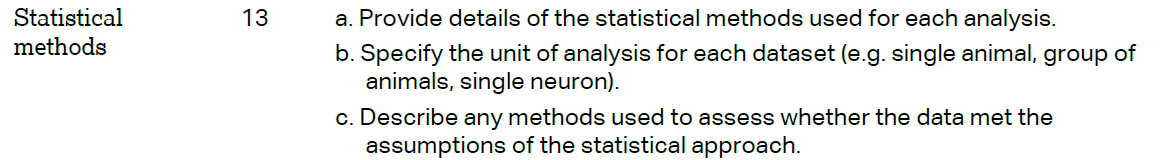 | x | |
| RESULTS |  | |
| 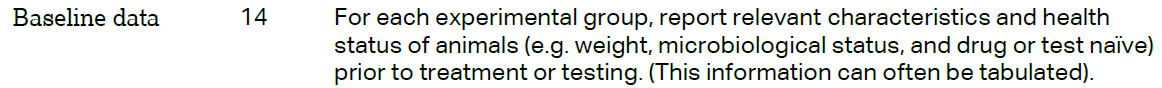 | x | |
| 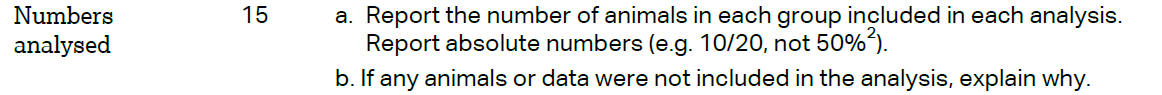 | x | |
| 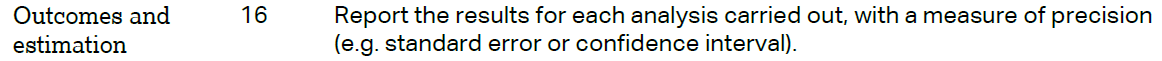 | x | |
| 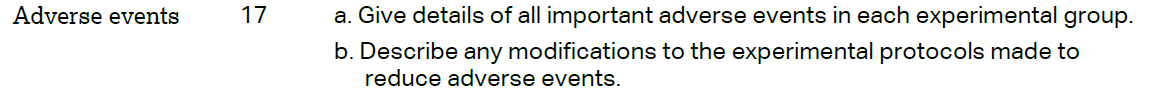 | x | |
| DISCUSSION |  | |
| 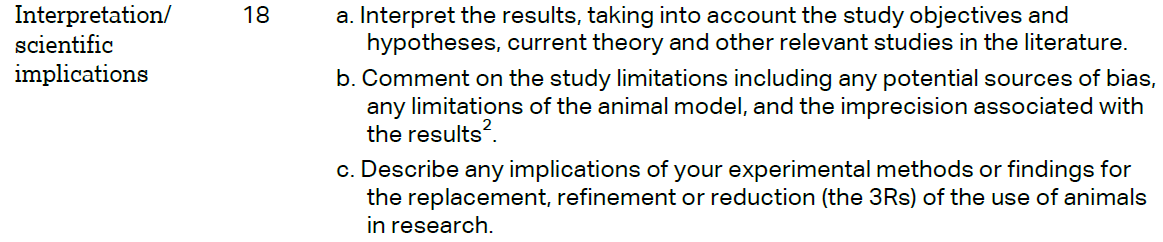 | x | |
| 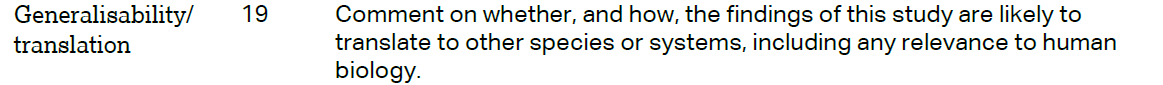 | x | |
| 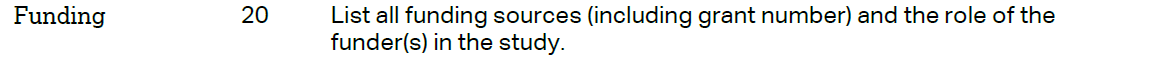 | | x |


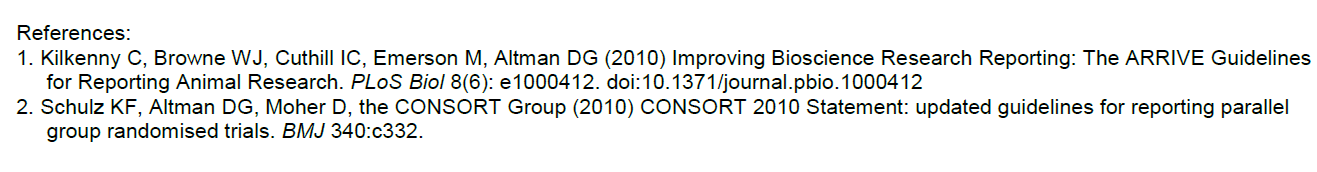

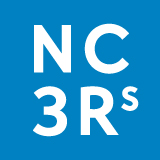

Supplement: S1 File — (DOCX) [file pone.0180548.s003.docx]
