# Supplementary material for: Effects of selective and combined activation of estrogen receptor α and β on reproductive organ development and sexual behaviour in Japanese quail (Coturnix japonica)
Source: PLoS One. 2017 Jul 3;12(7):e0180548. doi: 10.1371/journal.pone.0180548 (PMC5495399; doi:10.1371/journal.pone.0180548)
Supplement: S1 Data — (XLSX) [file pone.0180548.s002.xlsx]

## Sheet: Content
S1 Data. Body weights, morphology, behavior and plasma testosterone concentrations in embryonic, juvenile and adult Japanese quail following embryonic treatment with selective estrogen receptor agonists.
This file contains supplementary data to Mattsson and Brunström 2017, "Effects of selective and combined activation of estrogen receptor α and β on reproductive organ development and sexual behaviour in Japanese quail (Coturnix japonica)"
Contents
Sheet 1: Embryo morphology including beak-to-rump length, size and morphology of gonads, Müllerian duct morphology and length of the right Müllerian duct in females.
Sheet 2: Body weights of juvenile quail of both sexes at one, two and three weeks after hatching and in adult males at nine weeks after hatching.
Sheet 3: Morphology of juvenile quail of both sexes at three weeks after hatching, including body weight, morphology of oviducts and gonads, length of right oviduct in females and testis weight in males.
Sheet 4: Copulatory behavior, plasma testosterone, body weight, testis weight and morphology, presence of oviductal structures, and cloacal gland area in adult males.

## Sheet: 1 Embryo morphology
	Morphology of 16-day-old Japanese quail embryos
	Treatment	Sex	Beak-to-rump length (mm)	Right gonad morphology	Left gonad morphology	Width right gonad (mm)	Length right gonad (mm)	Size (L x W) of right gonad	Width left gonad (mm)	Length left gonad (mm)	Size (L x W) of left gonad	Right Müllerian duct morphology	Length right Müllerian duct	Left Müllerian duct morphology
	Control	Female	63.9	vestigial	Ovary	0.3	1.6	0.48	1.7	2.2	3.74	Normal	4.5	Normal
	Control	Female	61.5	vestigial	Ovary	0.4	1.4	0.56	1.5	3.4	5.1	Normal	2.8	Normal
	Control	Female	62.4		Ovary	0	0	0	2	3.2	6.4	Normal	3.2	Normal
	Control	Female	64.3		Ovary	0	0	0	1.7	3.6	6.12	Normal	2.15	Normal
	Control	Female	62.7	vestigial	Ovary	0.9	2	1.8	0.9	1.9	1.71	Normal	3.6	Normal
	Control	Female	63.9	vestigial	Ovary	0.5	1.2	0.6	1.9	4.3	8.17	Normal	1.5	Normal
	Control	Female	63.7	vestigial	Ovary	0.5	1.6	0.8	1.6	4.3	6.88	Normal	2.1	Normal
	Control	Female	65.7		Ovary	0	0	0	2	3	6	Normal	2.3	Normal
	Control	Female	64.5		Ovary	0	0	0	1.8	3.7	6.66	Normal	2.5	Normal
Mean			63.6222			0.288889	0.866667	0.471111	1.67778	3.28889	5.64222		2.73889
SD			1.25277			0.31798	0.848528	0.590179	0.338296	0.831331	1.91256		0.908219
	WAY (100µg / egg)	Female	63.1		Ovary	0	0	0	2.1	4.5	9.45	Normal	2	Normal
	WAY (100µg / egg)	Female	62.5	vestigial	Ovary	0.4	1.4	0.56	1.8	3.6	6.48	Normal	2.2	Normal
	WAY (100µg / egg)	Female	61.4		Ovary	0	0	0	1.6	4.3	6.88	Normal	2.8	Normal
	WAY (100µg / egg)	Female	60.3	vestigial	Ovary	0.4	1.3	0.52	1.9	3.5	6.65	Normal	3	Normal
	WAY (100µg / egg)	Female	63.7		Ovary	0	0	0	1.6	3.5	5.6	Normal	3.13	Normal
	WAY (100µg / egg)	Female	64.2		Ovary	0	0	0	2.2	3.8	8.36	Normal	1.8	Normal
	WAY (100µg / egg)	Female	65.1	vestigial	Ovary	0.85	1.7	1.445	2.5	2.8	7	None found	0	Normal
	WAY (100µg / egg)	Female	65		Ovary	0	0	0	1.6	3.11	4.976	Normal	2.8	Normal
	WAY (100µg / egg)	Female	62.9		Ovary	0	0	0	1.4	3.1	4.34	Normal	2.1	Normal
	WAY (100µg / egg)	Female	68.3		Ovary	0	0	0	1.5	3.4	5.1	Normal	2.9	Normal
	WAY (100µg / egg)	Female	69.6		Ovary	0	0	0	1.9	4.4	8.36	Normal	2.8	Normal
Mean			64.1909			0.15	0.4	0.229545	1.82727	3.63727	6.65418		2.32091
SD			2.76603			0.281957	0.691375	0.45743	0.334936	0.561678	1.59799		0.892418
	WAY (300µg / egg)	Female	62.6	vestigial	Ovary	0.8	0.9	0.72	2.05	4.2	8.61	Normal	2.2	Normal
	WAY (300µg / egg)	Female	58.9	vestigial	Ovary	0.4	1.3	0.52	1.5	3.7	5.55	Normal	3.6	Normal
	WAY (300µg / egg)	Female	64.5		Ovary	0	0	0	2.1	3.1	6.51	Normal	1.6	Normal
	WAY (300µg / egg)	Female	65.4		Ovary	0	0	0	2.2	3.2	7.04	Normal	2.3	Normal
	WAY (300µg / egg)	Female	62.8		Ovary	0	0	0	1.8	3.8	6.84	Normal	2.2	Normal
	WAY (300µg / egg)	Female	63.9		Ovary	0	0	0	1.9	2.9	5.51	Normal	2.16	Normal
	WAY (300µg / egg)	Female	65.6		Ovary	0	0	0	2	3.4	6.8	Normal	3.5	Normal
	WAY (300µg / egg)	Female	66.1		Ovary	0	0	0	1.7	3.4	5.78	Normal	3.1	Normal
	WAY (300µg / egg)	Female	67.2		Ovary	0	0	0	2	4.1	8.2	Normal	2	Normal
			64.1111			0.133333	0.244444	0.137778	1.91667	3.53333	6.76		2.51778
			2.46802			0.282843	0.495255	0.277929	0.217945	0.447214	1.09727		0.703807
	16αLE2 (0.3 µg / egg)	Female	63.7	vestigial	Ovary	0.7	1.2	0.84	2.1	4.3	9.03	None found	0	None found
	16αLE2 (0.3 µg / egg)	Female	64.6		Ovary	0	0	0	1.9	4.8	9.12	Malformed	15	Malformed
	16αLE2 (0.3 µg / egg)	Female	62.8		Ovary	0	0	0	1.9	3.7	7.03	Malformed	13	Malformed
	16αLE2 (0.3 µg / egg)	Female	57.4		Ovary	0	0	0	1.8	4	7.2	Malformed	10	Malformed
	16αLE2 (0.3 µg / egg)	Female	59		Ovary	0	0	0	2.5	4.3	10.75	Malformed	14	Malformed
	16αLE2 (0.3 µg / egg)	Female	66.2		Ovary	0	0	0	1.9	2.8	5.32	Malformed	12	Malformed
	16αLE2 (0.3 µg / egg)	Female	64.6		Ovary	0	0	0	1.6	3.9	6.24	Normal	5.3	Malformed
	16αLE2 (0.3 µg / egg)	Female	65.7		Ovary	0	0	0	1.9	4.4	8.36	Malformed	12	Malformed
	16αLE2 (0.3 µg / egg)	Female	61.7		Ovary	0	0	0	1.8	3.8	6.84	Malformed	11	Malformed
	16αLE2 (0.3 µg / egg)	Female	64.7		Ovary	0	0	0	2.2	4.1	9.02	Malformed	12	Malformed
	16αLE2 (0.3 µg / egg)	Female	63.7		Ovary	0	0	0	2.2	3.9	8.58	Malformed	11	Malformed
Mean			63.1			0.0636364	0.109091	0.0763636	1.98182	4	7.95364		10.4818
SD			2.74773			0.211058	0.361814	0.25327	0.248267	0.507937	1.56739		4.28411
	Control	Male	62.9	Testis	Testis	0.86	2.5	2.15	2.2	0.89	1.958	Completely regressed		Completely regressed
	Control	Male	60.9	Testis	Testis	0.8	2.7	2.16	0.7	2.2	1.54	Completely regressed		Completely regressed
	Control	Male	64.7	Testis	Testis	0.88	2.6	2.288	1	2.4	2.4	Completely regressed		Completely regressed
	Control	Male	66.3	Testis	Testis	0.8	2.7	2.16	1	2.5	2.5	Completely regressed		Completely regressed
	Control	Male	60.4	Testis	Testis	0.8	2.1	1.68	0.8	1.9	1.52	Completely regressed		Completely regressed
	Control	Male	65.2	Testis	Testis	0.9	2.7	2.43	0.8	2.3	1.84	Completely regressed		Completely regressed
	Control	Male	65.4	Testis	Testis	0.7	1.9	1.33	0.9	1.9	1.71	Completely regressed		Completely regressed
	Control	Male	63.3	Testis	Testis	1	2.3	2.3	0.7	2	1.4	Completely regressed		Completely regressed
	Control	Male	66.2	Testis	Testis	0.9	2.7	2.43	1	2.4	2.4	Completely regressed		Completely regressed
	Control	Male	57.2	Testis	Testis	0.8	2.1	1.68	0.9	1.9	1.71	Completely regressed		Completely regressed
	Control	Male	62.7	Testis	Testis	0.9	2.3	2.07	0.9	2.7	2.43	Completely regressed		Completely regressed
	Control	Male	63.9	Testis	Testis	0.9	2.4	2.16	1	2	2	Completely regressed		Completely regressed
	Control	Male	68.2	Testis	Testis	0.9	2.6	2.34	0.9	2.4	2.16	Completely regressed		Completely regressed
Mean			63.6385			0.856923	2.43077	2.09062	0.984615	2.11462	1.96677
SD			2.91792			0.0752091	0.271982	0.330341	0.380452	0.451047	0.383374
	WAY (100µg / egg)	Male	63.6	Testis	Testis	0.8	2.7	2.16	0.8	2	1.6	Completely regressed		Completely regressed
	WAY (100µg / egg)	Male	60.2	Testis	Testis	1	2.5	2.5	0.8	2.6	2.08	Completely regressed		Completely regressed
	WAY (100µg / egg)	Male	62.4	Testis	Testis	0.9	2.4	2.16	1.1	2.6	2.86	Completely regressed		Completely regressed
	WAY (100µg / egg)	Male	66.1	Testis	Testis	0.8	2.3	1.84	0.8	2.1	1.68	Completely regressed		Completely regressed
	WAY (100µg / egg)	Male	63.9	Testis	Testis	0.9	2.3	2.07	0.9	1.9	1.71	Completely regressed		Completely regressed
	WAY (100µg / egg)	Male	68.6	Testis	Testis	0.7	2.1	1.47	1	2	2	Completely regressed		Completely regressed
	WAY (100µg / egg)	Male	63.4	Testis	Testis	0.8	3.2	2.56	not determined	not determined	not determined	Completely regressed		Completely regressed
	WAY (100µg / egg)	Male	56.5	Testis	Testis	0.7	2.8	1.96	0.8	2.5	2	Completely regressed		Completely regressed
	WAY (100µg / egg)	Male	64.4	Testis	Testis	0.8	2.5	2	1.3	1.9	2.47	Completely regressed		Completely regressed
	WAY (100µg / egg)	Male	64.6	Testis	Testis	1	2.4	2.4	1	2	2	Completely regressed		Completely regressed
	WAY (100µg / egg)	Male	68.1	Testis	Testis	0.9	2.4	2.16	0.9	1.9	1.71	Completely regressed		Completely regressed
Mean			63.8			0.845455	2.50909	2.11636	0.94	2.15	2.011
SD			3.4094			0.103573	0.298176	0.310557	0.164655	0.295334	0.393882
	WAY (300µg / egg)	Male	62.7	Testis	Testis	0.9	2.4	2.16	0.9	2	1.8	Completely regressed		Completely regressed
	WAY (300µg / egg)	Male	65.5	Testis	Testis	0.7	2.2	1.54	1.1	2.2	2.42	Completely regressed		Completely regressed
	WAY (300µg / egg)	Male	64	Testis	Testis	0.74	2.8	2.072	1	2.7	2.7	Completely regressed		Completely regressed
	WAY (300µg / egg)	Male	64.9	Testis	Testis	0.8	2.4	1.92	0.7	1.9	1.33	Completely regressed		Completely regressed
	WAY (300µg / egg)	Male	65	Testis	Testis	0.8	3.2	2.56	0.9	2.6	2.34	Completely regressed		Completely regressed
	WAY (300µg / egg)	Male	66.9	Testis	Testis	0.9	2.5	2.25	1.1	2.1	2.31	Completely regressed		Completely regressed
	WAY (300µg / egg)	Male	57.5	Testis	Testis	0.7	2.3	1.61	0.6	1.9	1.14	Completely regressed		Completely regressed
	WAY (300µg / egg)	Male	65.9	Testis	Testis	0.7	2.5	1.75	0.8	1.9	1.52	Completely regressed		Completely regressed
	WAY (300µg / egg)	Male	67.7	Testis	Testis	0.7	2.5	1.75	1	2.4	2.4	Completely regressed		Completely regressed
	WAY (300µg / egg)	Male	64.3	Testis	Testis	1	2.7	2.7	1	2.5	2.5	Completely regressed		Completely regressed
	WAY (300µg / egg)	Male	62.2	Testis	Testis	0.9	2.1	1.89	1	2.5	2.5	Completely regressed		Completely regressed
	WAY (300µg / egg)	Male	64.9	Testis	Testis	0.8	1.9	1.52	0.8	1.9	1.52	Completely regressed		Completely regressed
	WAY (300µg / egg)	Male	64.1	Testis	Testis	0.7	2.2	1.54	0.9	2	1.8	Completely regressed		Completely regressed
Mean			64.2769			0.795385	2.43846	1.94323	0.907692	2.2	2.02154
SD			2.53086			0.101375	0.333013	0.387749	0.149786	0.3	0.521326
	16αLE2 (0.3 µg / egg)	Male	65.8	Small testis	Ovotestis	0.6	1.6	0.96	1.05	2.6	2.73	Completely regressed	0	Malformed
	16αLE2 (0.3 µg / egg)	Male	63.9	Small testis	Ovotestis	0.6	1.7	1.02	1.2	3.4	4.08	Completely regressed	0	Malformed
	16αLE2 (0.3 µg / egg)	Male	67.5		Ovotestis	0	0	0	1.1	2.6	2.86	Malformed	5.5	Malformed
	16αLE2 (0.3 µg / egg)	Male	64.2	Small testis	Testis	0.4	1.9	0.76	0.8	3.2	2.56	Malformed	13	Malformed
	16αLE2 (0.3 µg / egg)	Male	62.5	Small testis	Ovotestis	0.5	1.8	0.9	1	2.6	2.6	Malformed	13	Malformed
	16αLE2 (0.3 µg / egg)	Male	65.7	Small testis	Ovotestis	0.6	1.6	0.96	1.1	2	2.2	Malformed	12	Malformed
	16αLE2 (0.3 µg / egg)	Male	65.5	Small testis	Testis	0.6	1.4	0.84	1	2.5	2.5	Malformed	9.6	Malformed
	16αLE2 (0.3 µg / egg)	Male	67	Small testis	Ovotestis	0.4	1.4	0.56	1.1	2.1	2.31	Malformed	14	Malformed
	16αLE2 (0.3 µg / egg)	Male	64.1		Ovotestis	0	0	0	1.3	2.3	2.99	Completely regressed	0	Completely regressed
	16αLE2 (0.3 µg / egg)	Male	66.6	Small testis	Ovotestis	0.6	1.5	0.9	1.1	2.7	2.97	Malformed	13	Malformed
	16αLE2 (0.3 µg / egg)	Male	68.4	Small testis	Testis	0.5	2.1	1.05	0.9	2.4	2.16	Completely regressed	0	Malformed
Mean			65.5636			0.436364	1.36364	0.722727	1.05909	2.58182	2.72364		7.28182
SD			1.76537			0.229228	0.706078	0.381735	0.13568	0.41909	0.533391		6.21399

## Sheet: 2 Post-hatch body weight
	Body weights (g) of Japanese quail of both sexes at one week after hatching.					Body weights (g) of Japanese quail of both sexes at two weeks after hatching.					Body weights (g) of Japanese quail of both sexes at three weeks after hatching.					Body weights (g) of adult male Japanese quail at nine weeks after hatching.
	Control	WAY	16αLE2	WAY+16αLE2		Control	WAY	16αLE2	WAY+16αLE2		Control	WAY	16αLE2	WAY+16αLE2		Control	WAY	16αLE2	WAY+16αLE2
	35	27	35	32		95	107	105	84		175	166	149	162		290	295	303	327
	28	35	34	35		94	91	86	91		164	169	146	162		292	276	315	279
	37	35	33	36		86	108	87	89		162	188	165	171		277	257	334	312
	46	40	38	34		116	89	102	85		165	190	167	180		322	345	362	298
	38	31	22	34		100	99	79	87		157	150	168	181		275	330	290	273
	38	37	28	34		86	105	88	92		165	165	177	150		291	370	263	276
	34	39	34	30		100	87	93	93		169	167	165	160		331	263	295	350
	36	34	39	33		90	67	88	90		164	186	166	148		309	349	300	282
	33	32	32	29		103	90	104	91		176	157	160	155		275	307		304
	33	34	35	38		77	93	102	91		154	158	158	172
	38	36	41	37		89	100	82	92		146	139	165	99
	39	28	39	33		107	93	94	103		144	184	170	152
	37	33	32	33		96	89	90	98		142	181	159	164
	41	34	40	33		84	78	100	96		177	192	159	165
	33	37	26	40		95	100	91	82		151	165	185	158
	26	36	35	35		96	105	80	99		149	190	153	164
	34	33	35	30		83	93	97	86		185	135	158	175
	36	28	29	35		99	105	108	85		140	157	155	165
	38	33	35	36		101	98	97	85		133	170	149	168
	28	30	33	33		100	81	95	101		162	169	168	158
	37	41	28	33		86	92	87	100		149	181	151	138
	35	30	28	26		97	92	87	93		173	158	137	183
	37	34	32	32		98	91	101	93		166	164	183	170
	42	17	37	36		85	94	93	67		165	169	170	197
	34	38	34	32		91	100	79	79		158	160	197	173
	35	33	33	37		94	93	75	89		157	178	173	150
	29	39	29	33		94	90	91	92		158	167	150	161
	32	32	29	29		89	99	94	86		150	186	161	178
	32	36	28	31		79	106	86	96		143	162	178	132
	39	35	32	28		83	94	84	92		165	171	132	143
	35	35	34			78	89	79			176	166	143
	36	32	33			79	100				180	156
	30	39				90	92				154	177
	38	33				100	94				158	165
	36	40				80	83				168	149
	29	31				78	79				165	142
	32					67					131
	39					101					143
	28					90					173
	36					95					168
	25
	40
Mean	34.8571	33.8056	32.875	33.2333		91.275	93.5	91.0968	90.2333		159.5	167.472	161.839	161.133		295.778	310.222	307.75	300.111
SD	4.44792	4.54073	4.29366	3.09263		9.65823	8.88498	8.65392	7.23823		13.0463	14.5435	14.1353	18.2487		20.5838	40.5487	29.8747	26.1316
N	42	36	32	30		40	36	31	30		40	36	31	30		9	9	8	9

## Sheet: 3 Juveniles morphology
	Morphology of juvenile female Japanese quail at three weeks after hatching					Morphology of juvenile male Japanese quail at three weeks after hatching
	Treatment	Body weight (g)	Length of right oviduct (mm)	Malformed left oviduct		Treatment	Body weight (g)	Oviductal structures right	Oviductal structures left	Right testis weight (mg)	Left testis weight (mg)	Gonado-somatic index (%)	Left / right testis weight ratio	Other
	Control	175	12			Control	164			27	29	0.0341463	1.07407
	Control	157	8			Control	162			60	62	0.0753086	1.03333
	Control	165	0			Control	165			40	48	0.0533333	1.2
	Control	169	0			Control	142			20	26	0.0323944	1.3
	Control	164	8			Control	177			37	37	0.0418079	1
	Control	176	8			Control	151			45	43	0.0582781	0.955556	Dark spot on left testis
	Control	154	5			Control	149			13	11	0.0161074	0.846154
	Control	146	6			Control	185			33	48	0.0437838	1.45455
	Control	144	5			Control	140			23	29	0.0371429	1.26087
	Mean	161.111	5.77778			Control	133			31	49	0.0601504	1.58065
	SD	11.6667	3.89801			Control	162			35	35	0.0432099	1
						Mean	157.273			33.0909	37.9091	0.0450603	1.15502
	WAY	166	5.7			SD	15.9254			12.8488	14.0247	0.0160685	0.225771
	WAY	169	10
	WAY	188	7			WAY	165			102	96	0.12	0.941176
	WAY	190	3			WAY	190			58	107	0.0868421	1.84483
	WAY	150	5			WAY	135			14	35	0.0362963	2.5
	WAY	165	4			WAY	157			22	41	0.0401274	1.86364
	WAY	167	0			WAY	170			54	58	0.0658824	1.07407
	WAY	186	6			WAY	169			31	42	0.0431953	1.35484
	WAY	157	6			WAY	181			46	58	0.0574586	1.26087
	WAY	158	0			WAY	158			67	73	0.0886076	1.08955
	WAY	139	5			WAY	164			59	70	0.0786585	1.18644
	WAY	184	7			WAY	169			25	47	0.0426036	1.88	Dark spot on right testis
	WAY	181	13			WAY	160			21	25	0.02875	1.19048
	WAY	192	7			WAY	178			45	38	0.0466292	0.844444
	Mean	170.857	5.62143			WAY	167			81	101	0.108982	1.24691
	SD	16.3982	3.43157			Mean	166.385			48.0769	60.8462	0.0649256	1.40594
						SD	13.3075			25.844	26.8354	0.0293103	0.475121
	16αLE2	159	0	Yes
	16αLE2	159	31	Yes		16αLE2	149			20	40	0.0402685	2
	16αLE2	185	8	Yes		16αLE2	146	Yes	Yes	24	52	0.0520548	2.16667
	16αLE2	153	24	Yes		16αLE2	165	Yes	Yes	15	31	0.0278788	2.06667
	16αLE2	158	0	Yes		16αLE2	167		Yes	20	36	0.0335329	1.8
	16αLE2	155	31	Yes		16αLE2	168		Yes	14	21	0.0208333	1.5
	16αLE2	149	28			16αLE2	177			27	65	0.0519774	2.40741	Blacka spot on left gonad
	16αLE2	168	0	yes		16αLE2	165		Yes	22	42	0.0387879	1.90909
	16αLE2	151	Cyst < 10 mm	yes		16αLE2	166		Yes	23	44	0.0403614	1.91304
	16αLE2	137	31	yes		16αLE2	160		Yes	22	34	0.035	1.54545	Black spot on right and left testis
	Mean	157.4	17			16αLE2	158			18	48	0.0417722	2.66667
	SD	12.6157	14.6031			16αLE2	165	Yes	Yes	5	16	0.0127273	3.2
						16αLE2	170			51	122	0.101765	2.39216
	16αLE2 + WAY	148	30	Yes		Mean	163			21.75	45.9167	0.0414133	2.1306
	16αLE2 + WAY	155	29	Yes		SD	8.6655			10.8555	27.3478	0.0221758	0.480928
	16αLE2 + WAY	172	0	Yes
	16αLE2 + WAY	99	22			16αLE2 + WAY	162			30	55	0.0524691	1.83333
	16αLE2 + WAY	152	12	Yes		16αLE2 + WAY	162			30	49	0.0487654	1.63333
	16αLE2 + WAY	164	Cyst >10 mm	Yes		16αLE2 + WAY	171		Yes	21	58	0.0461988	2.7619
	16αLE2 + WAY	165	28	Yes		16αLE2 + WAY	180	Yes	Yes	18	54	0.04	3	Black spot on right testis
	16αLE2 + WAY	158	26	Yes		16αLE2 + WAY	181	Yes	Yes	13	22	0.019337	1.69231	Right testis completely black
	16αLE2 + WAY	164	39	Yes		16αLE2 + WAY	150	Yes	Yes	33	122	0.103333	3.69697
	16αLE2 + WAY	175	35	Yes		16αLE2 + WAY	160	Yes	Yes	9	41	0.03125	4.55556
	16αLE2 + WAY	165	28	Yes		Mean	166.571			22	57.2857	0.0487648	2.73906
	16αLE2 + WAY	168	34	Yes		SD	11.3116			9.27362	31.0468	0.0266071	1.11239
	16αLE2 + WAY	158	0	Yes
	16αLE2 + WAY	138	23	Yes
	Mean	155.786	23.5385
	SD	19.0391	12.3869

## Sheet: 4 Adult males behavior and morp
		Copulatory behavior*											Morphology
		No of positive trials out of five				No of displayed CCM each trial
Id	Treatment	NG	MA	M	CCM	Trial 1	Trial 2	Trial 3	Trial 4	Trial 5	Mean no of CCM per trial	Plasma testosterone (nmol/L)	Body weight (g)	Right testis weight (g)	Left testis weight (g)	Gonado-somatic index (%)	Left / right testis weight ratio	Cloacal gland area (mm2)	Oviductal structures	Testis abnormalities
1	Control	5	5	5	4	0	2	3	7	1	2.6	11.5	290	3.4	5	2.89655	1.47059	378
5	Control	5	5	4	1	0	0	0	0	2	0.4	5.6	292	4.3	6.5	3.69863	1.51163	352
9	Control	5	5	4	4	2	2	0	2	2	1.6	6.4	277	3.7	4.11	2.81949	1.11081	414
13	Control	5	5	5	4	4	0	2	5	4	3	6.1	322	3.4	3.4	2.1118	1	425
17	Control	5	5	5	5	2	1	3	5	5	3.2	4	275	2.7	3.15	2.12727	1.16667	437
21	Control	5	5	5	5	1	3	1	7	1	2.6	7.3	291	2.6	4.2	2.33677	1.61538	475
25	Control	5	5	4	4	2	0	7	6	5	4	12.9	331	3.6	3.3	2.08459	0.916667	552
29	Control	5	5	4	4	2	0	1	1	2	1.2	14.2	309	3.1	5.1	2.65372	1.64516	480
33	Control	5	5	5	5	4	2	5	3	2	3.2	8.3	275	2.8	3.7	2.36364	1.32143	456
Mean		5	5	4.55556	4	1.88889	1.11111	2.44444	4	2.66667	2.42222	8.47778	295.778	3.28889	4.27333	2.56583	1.30648	441
SD		0	0	0.527046	1.22474	1.45297	1.16667	2.35112	2.59808	1.58114	1.13774	3.5559	20.5838	0.548736	1.08985	0.522984	0.269974	59.2811
3	WAY	5	5	5	4	0	1	1	3	2	1.4	16.1	295	2.5	5.1	2.57627	2.04	340
7	WAY	5	5	5	5	3	2	1	4	1	2.2	7.9	276	4	3.9	2.86232	0.975	520
11	WAY	5	5	5	5	2	6	10	7	3	5.6	3.9	257	3.3	4	2.84047	1.21212	440
15	WAY	5	5	5	3	0	0	2	1	3	1.2	12.1	345	3.3	3.8	2.05797	1.15152	432
19	WAY	5	5	4	4	0	2	5	4	1	2.4	3.7	330	3	3.7	2.0303	1.23333	546
23	WAY	5	4	0	0	0	0	0	0	0	0	6.6	370	2.9	3.7	1.78378	1.27586	540
27	WAY	5	5	5	4	1	0	3	2	4	2	11	263	1.8	5.7	2.85171	3.16667	345
31	WAY	5	5	5	0	0	0	0	0	0	0	16.7	349	2.9	5.8	2.49284	2	540
34	WAY	5	5	4	2	0	0	1	0	2	0.6	13.9	307	2.3	4.9	2.34528	2.13043	576
Mean		5	4.88889	4.22222	3	0.666667	1.22222	2.55556	2.33333	1.77778	1.71111	10.2111	310.222	2.88889	4.51111	2.42677	1.68721	475.444
SD		0	0.333333	1.64148	1.93649	1.11803	1.98606	3.2059	2.39792	1.39443	1.70913	4.9395	40.5487	0.639227	0.868108	0.40022	0.707343	89.3828
2	16αLE2	5	5	5	5	1	1	1	3	5	2.2	17.2	303	2	5.5	2.47525	2.75	149.85		yes
6	16αLE2	5	5	5	5	2	1	7	8	1	3.8	4.8	315	2.9	6.6	3.01587	2.27586	285	left	yes
10	16αLE2	5	5	4	2	1	2	0	0	0	0.6	6.2	334	2.5	5.6	2.42515	2.24	252
14	16αLE2	5	5	4	2	1	0	2	0	0	0.6	4.7	362	2.6	4.1	1.85083	1.57692	210	left and right	yes
18	16αLE2	5	5	5	5	1	1	4	2	8	3.2	6.6	290	2	7.2	3.17241	3.6	266		yes
22	16αLE2	5	5	5	5	1	1	1	2	1	1.2	14.1	263	2.3	4.4	2.54753	1.91304	285	left
26	16αLE2	5	5	5	4	2	0	3	2	1	1.6	14.3	295	2.8	5.3	2.74576	1.89286	285
30	16αLE2	5	5	5	3	2	0	1	4	0	1.4	4.4	300	2.5	5.5	2.66667	2.2	304		yes
Mean		5	5	4.75	3.875	1.375	0.75	2.375	2.625	2	1.825	9.0375	307.75	2.45	5.525	2.61243	2.30609	254.606
SD		0	0	0.46291	1.3562	0.517549	0.707107	2.26385	2.55999	2.9277	1.16833	5.24021	29.8747	0.333809	1.02225	0.402707	0.626182	51.1458
4	WAY+16αLE2	5	5	2	0	0	0	0	0	0	0	5.2	327	2.4	4	1.95719	1.66667	266	left
8	WAY+16αLE2	5	5	4	2	3	0	0	0	2	1	9.9	279	3.5	6.15	3.45878	1.75714	247		yes
12	WAY+16αLE2	5	5	5	3	3	0	3	0	4	2	0.9	312	2.4	5.5	2.53205	2.29167	221		yes
16	WAY+16αLE2	5	5	5	3	0	0	1	4	4	1.8	16.6	298	3.5	4.8	2.78523	1.37143	234	left and right
20	WAY+16αLE2	5	5	4	4	0	2	2	10	2	3.2	6.3	273	2.6	4	2.41758	1.53846	285
24	WAY+16αLE2	5	5	4	2	0	0	0	6	2	1.6	12	276	1.9	3.7	2.02899	1.94737	208
28	WAY+16αLE2	5	5	5	1	0	0	0	2	0	0.4	11.1	350	3.1	5.5	2.45714	1.77419	234
32	WAY+16αLE2	5	5	4	3	1	3	0	0	5	1.8	6.6	282	2.7	6.3	3.19149	2.33333	252	left
35	WAY+16αLE2	5	5	5	3	2	2	0	0	1	1	9.3	304	1.3	5.7	2.30263	4.38462	182	left and right	yes
Mean		5	5	4.22222	2.33333	1	0.777778	0.666667	2.44444	2.22222	1.42222	8.65556	300.111	2.6	5.07222	2.57012	2.11832	236.556
SD		0	0	0.971825	1.22474	1.32288	1.20185	1.11803	3.5746	1.7873	0.951023	4.5291	26.1316	0.719375	0.98015	0.499955	0.907506	30.8387
f1	Control female											2.2
f2	Control female											1
f3	Control female											0.3
f4	Control female											1.3
f5	Control female											2.1
f6	Control female											1
f7	Control female											1.5
f8	Control female											1.8
f9	Control female											0.7
Mean												1.32222
SD												0.639878
NG: neck grab, M: MA: mount attempt, M: mount, CCM: cloacal contact movements
